# Supplementary material for: Patterns of molecular evolution in a parthenogenic terrestrial isopod (Trichoniscus pusillus)
Source: PeerJ journal article supplement (doi:10.7717/peerj.17780), 2024-07-23

Model with equal codon frequencies  
(CodonFreq=0)

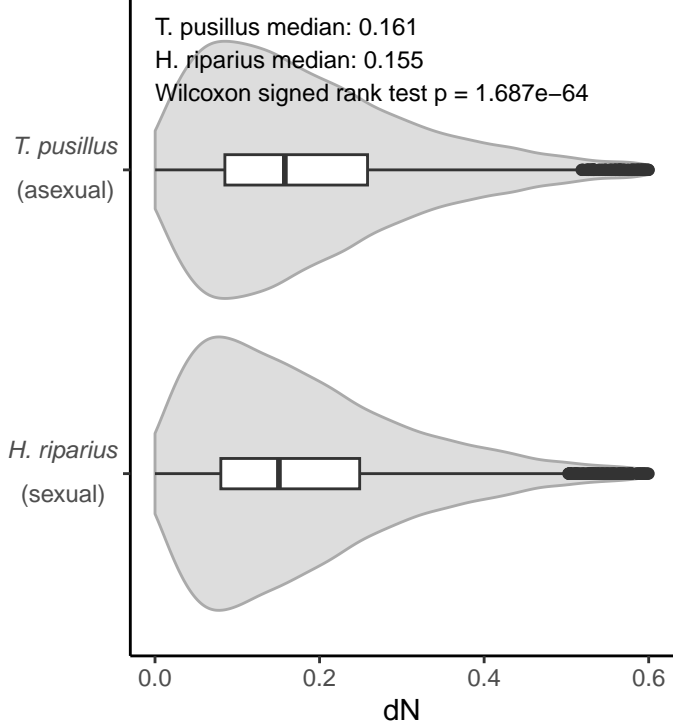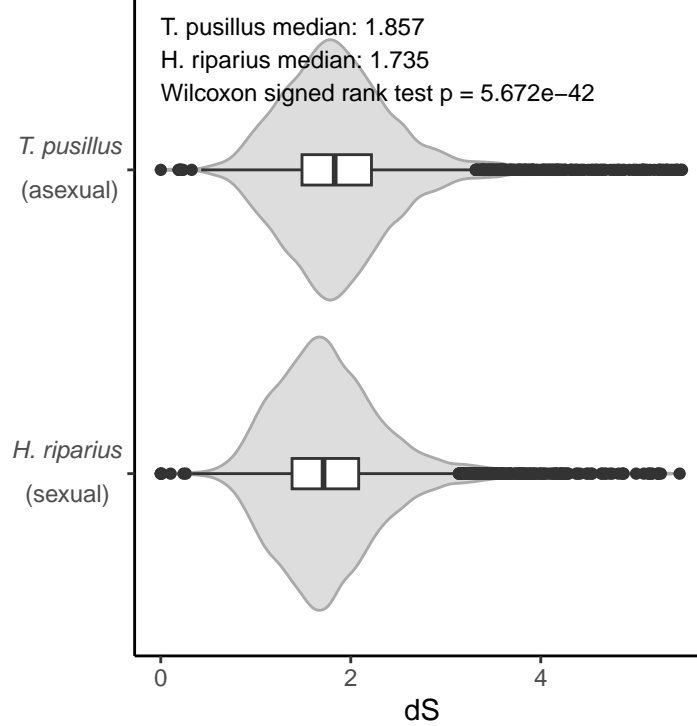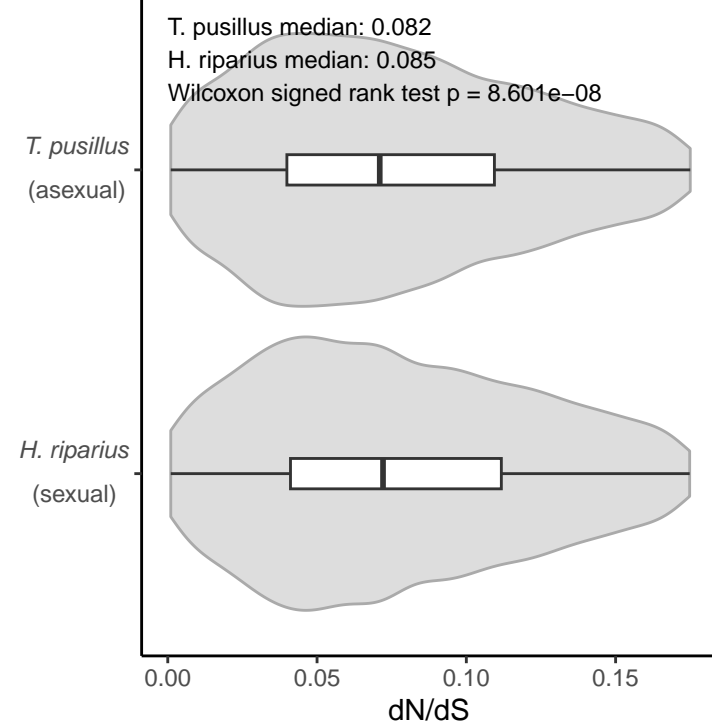

Codon frequencies estimated from  
average nucleotide frequencies  
(CodonFreq=1)

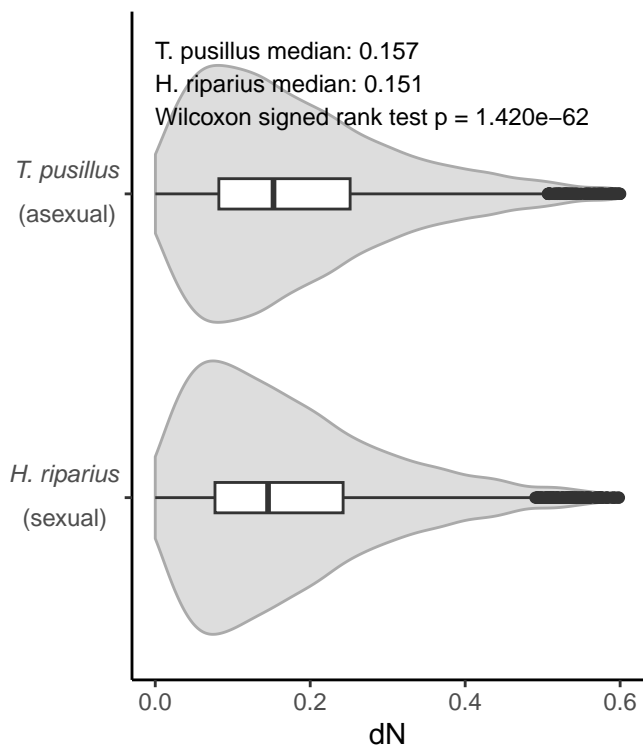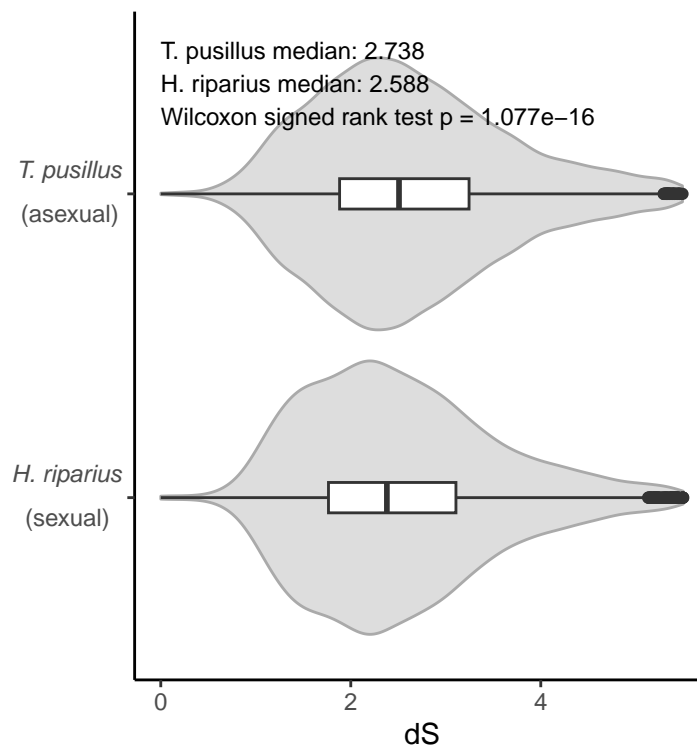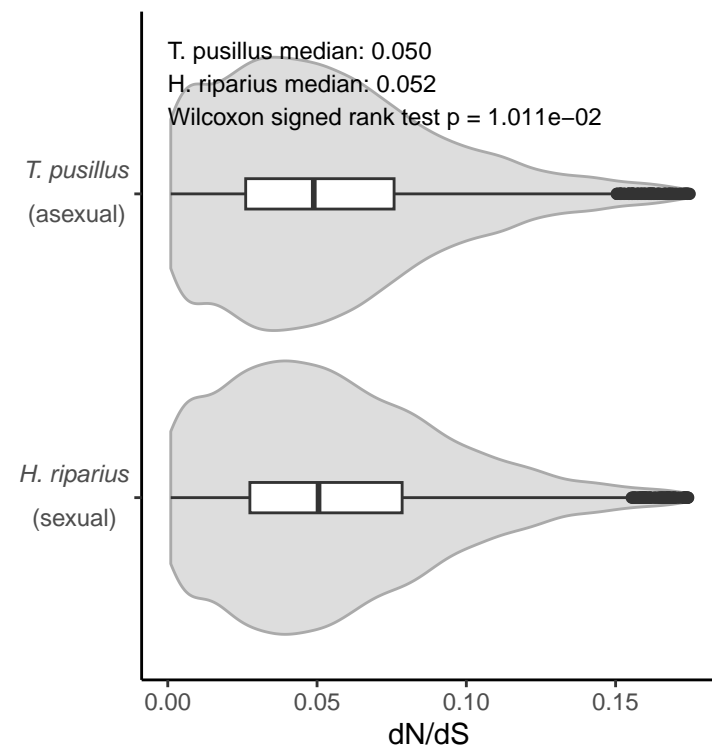

Codon frequencies estimated from average  
nucleotide frequencies at the each codon position  
(CodonFreq=2)

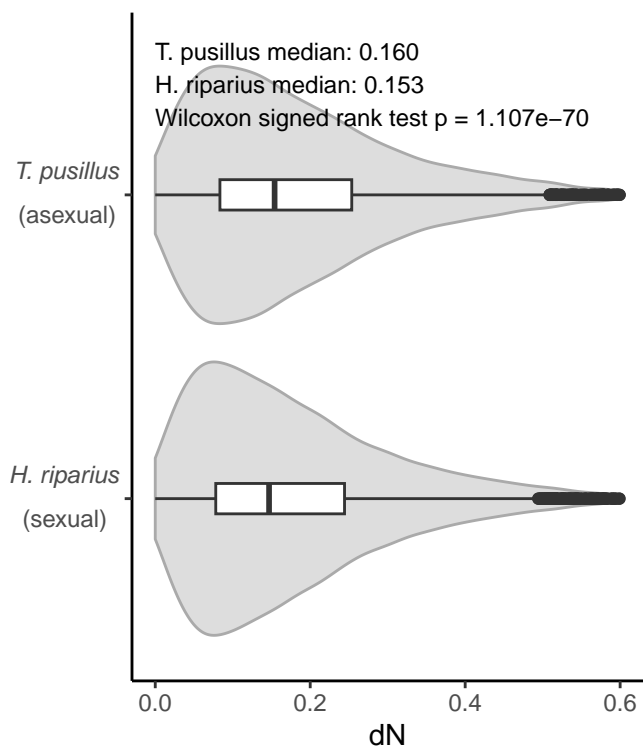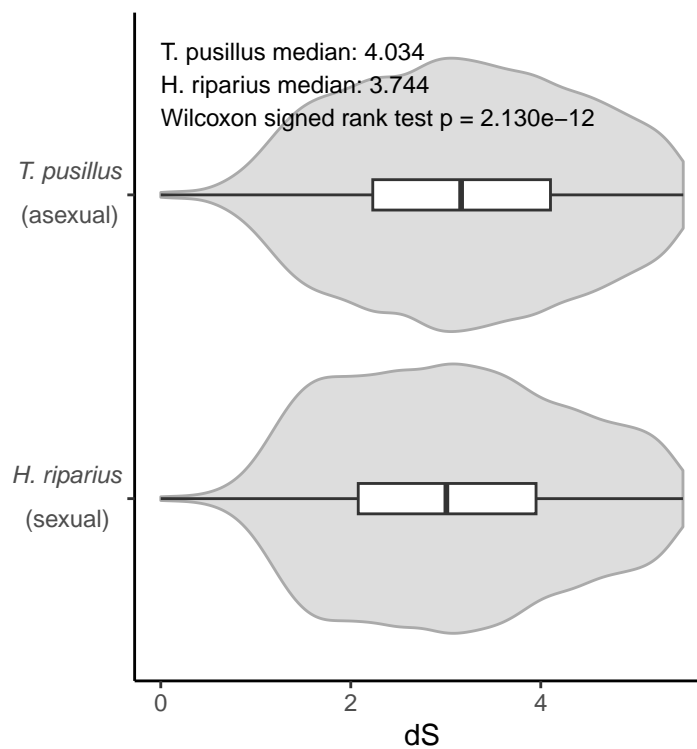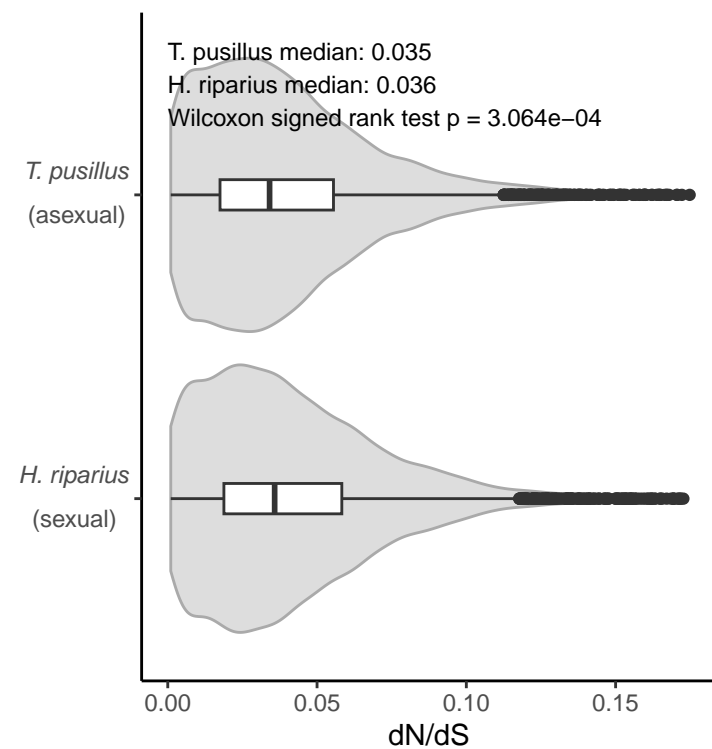

Supplement: SuppFig1.pdf [file SuppFig1.pdf]
